# Supplementary material for: Navigating ethical minefields: a multi-stakeholder approach to assessing interconnected risks in generative AI using grey DEMATEL
Source: Front Artif Intell. 2025 Jul 1;8:1611024. doi: 10.3389/frai.2025.1611024 (PMC12261451; doi:10.3389/frai.2025.1611024)
Supplement: Supplementary file 1 [file Table_1.xlsx]

## Sheet: ReadMe
Dear Generative AI Policy Makers, As a professional engaged in the leadership & policy making of Generative AI, your insights are invaluable to understanding the landscape of risks associated with generative AI technologies. We are conducting a survey to gather expert opinions on various risk factors related to the development and deployment of generative AI models. Purpose of the Survey: The obj…

## Sheet: Section A  Basic Information
	Section A : Basic Information
1	Submitter Full Name	Shivani Kabu
2	Submitter Email Address	shikabu1@in.ibm.com
3	Expereince	16-25
4	Primary Industry	Insurance
5	What is the Primary Purpose for which you were using this LLM?	Summarize Content
6	How satisfied are you with the performance of the model for the specific task	Highly Satisfied

## Sheet: Section B Relationship Matrix
Section B: Risk Relationship Matrix
Instructions: 1. Please click 'Enable Editing' button if the excel opens in 'Protected View' mode. 2. For every cell selected, you will see a dropdown from which values can be chosen.	RE1 Adversarial Prompts			RE2 Not Suitable for Work prompts			RE3 Confidential Data in Prompts			RE4 Data Bias			RE5 Data Usage Rights			RE6 Model Transparency			RE7 Software Security Issues			RE8 Hardware Vulnerabilities			RE9: Output Bias			RE10 Copyright Infringement			RE11 Halluciantion			RE12 Toxic Output			RE13 Improper Usage			RE14 Explaining Output
	Enabler → RE1	RE1 →Enabler		Enabler → RE2	RE2 →Enabler		Enabler → RE3	RE3 →Enabler		Enabler → RE4	RE4 →Enabler		Enabler → RE5	RE5 →Enabler		Enabler → RE6	RE6 →Enabler		Enabler → RE7	RE7 →Enabler		Enabler → RE8	RE8 →Enabler		Enabler →RE9	E9 →Enabler		Enabler → RE10	RE10 →Enabler		Enabler → RE11	RE11 →Enabler		Enabler → RE12	RE12 →Enabler		Enabler → RE13	RE13 →Enabler		Enabler → RE14	RE14 →Enabler
RE1: Adversarial Prompts
RE2: Not Suitable for Work Prompts	Medium	High
RE3: Confidential Data in Prompts	High	High		High	Medium
RE4: Data Bias	High	High		Medium	High		High	High
RE5: Data Usage Rights	High	High		Medium	High		Medium	High		Low	Very low
RE6: Model Transparency	High	High		Medium	Medium		High	Medium		Very high	Very high		Medium	Medium
RE7: Software Security Issues	High	High		Medium	High		High	Medium		Medium	Very low		Medium	Low		Very low	Very high
RE8: Hardware Vulnerabilities	High	High		Medium	High		Medium	Medium		Very high	Low		Medium	Low		High	Very high		Very high	Low
RE9: Output Bias	High	High		High	High		High	Medium		Very high	Medium		Medium	Medium		Medium	Very low		Very high	Low		Very high	High
RE10: Copyright Infringement	Medium	High		Medium	High		Medium	Low		Low	Very low		Low	Medium		Very high	Low		High	Very high		Low	Very high		Medium	Medium
RE11: Hallucination	High	Medium		High	High		Medium	Low		Medium	High		Medium	Low		Low	High		Very low	Low		Medium	Very high		Medium	High		Medium	High
RE12: Toxic Output	Medium	High		High	High		Very high	Low		Medium	High		High	High		Low	Medium		Very low	Medium		Very high	Very high		Medium	High		High	High		Medium	High
RE13: Improper Usage	Medium	High		High	High		Low	Medium		Medium	High		Very low	Very high		Very low	Very low		Low	Medium		High	Medium		Medium	Medium		High	Medium		Medium	High		Medium	High
RE14:Explaining Output	Medium	High		Medium	Medium		Very low	Medium		High	High		Very high	Low		Low	Very high		Very low	Very low		Medium	High		Medium	High		Medium	High		Medium	High		Medium	High		Medium	High
Additional Comments

## Sheet: Risk Enablers Explained
Generative AI Risk Category	Generative AI Risk Enablers	Denotation	Explanation	Traditional/Amplified/New Gen AI Risk
Input Module	Adversarial Prompts	RE1	Deliberately crafting prompts to trick the AI into generating harmful or misleading responses. For example, manipulating a text generator to produce offensive content by subtly tweaking the input prompts.	New
	Not Suitable for Work prompts	RE2	Submitting prompts that lead to the generation of content inappropriate for professional or general settings, such as explicit adult content or graphic violence. Example: A user requests a generative AI to create an image or story with explicit themes.	Amplified
	Confidential Data in Prompts	RE3	Accidentally or intentionally using sensitive or confidential information in prompts, which risks exposing this data in the AI's output. Example: Including personal identification numbers or proprietary business information in a data processing request.	New
Training and Tuning Module	Data Bias	RE4	The presence of prejudiced or skewed data in training sets that lead the AI to generate biased outputs. For example, a language model trained on biased historical texts may produce stereotypical or discriminatory language.	Amplified
	Data Usage Rights	RE5	Using data in ways that violate copyrights, licensing agreements, or terms of service. Example: A company uses copyrighted images to train an AI without obtaining proper permissions.	Amplified
	Model Transparency	RE6	The lack of clear, accessible information on the AI model's workings can prevent users from fully understanding or trusting its decisions. For example, if a financial advisory AI provides investment suggestions without explaining the reasoning, users may be hesitant to follow the advice.	Amplified
Toolchain Module	Software Security Issues	RE7	Vulnerabilities in the software tools used to develop, train, or deploy AI models can lead to security risks. An example is an AI development platform that is susceptible to code injections that could alter model behavior	Amplified
	Hardware Vulnerabilities	RE8	Physical or firmware vulnerabilities in the hardware used for AI operations could compromise the entire system. For instance, unauthorized access to a server’s hardware could lead to the theft or alteration of AI data.	Amplified
Output Module	Output Bias	RE9	AI outputs that disproportionately favor or disfavor certain groups due to biases in the data or model. An example is a recruitment AI that favors candidates from a particular demographic due to biased training data.	New
	Copyright Infringement	RE10	AI-generated content that inadvertently copies or closely mimics copyrighted works without permission. For example, an AI that composes music may create a piece that closely resembles a copyrighted song.	New
	Halluciantion	RE11	AI models producing outputs that are completely unfounded or factually incorrect, often due to overfitting or data quality issues. An example is a historical AI generating an inaccurate event that never occurred.	New
	Toxic Output	RE12	AI models outputting content that could be considered offensive, discriminatory, or harmful. This might occur in response to certain inputs or because of biases in the training data, such as an AI generating hate speech.	New
	Improper Usage	RE13	Applying AI models in contexts they were not designed for, potentially leading to inaccurate or unsafe outcomes. For example, using a model trained on adult fiction to generate children's stories.	New
	Explaining Output	RE14	Inadequate explanations for the decisions made by AI models can make it difficult for users to understand or validate the results. For instance, a medical diagnosis AI failing to provide reasons for its conclusions could lead to trust issues among healthcare professionals.	Amplified
